# Supplementary material for: IFN-α/β Signaling Is Required for CDG-Mediated CTL Generation and B Lymphocyte Activation
Source: Pharmaceutics. 2022 Dec 16;14(12):2821. doi: 10.3390/pharmaceutics14122821 (PMC9786310; doi:10.3390/pharmaceutics14122821)
Supplement: Supplementary file 1 [file pharmaceutics-14-02821-s001.zip › pharmaceutics-2084986-supplementary.pdf]

# Supplementary Figures:

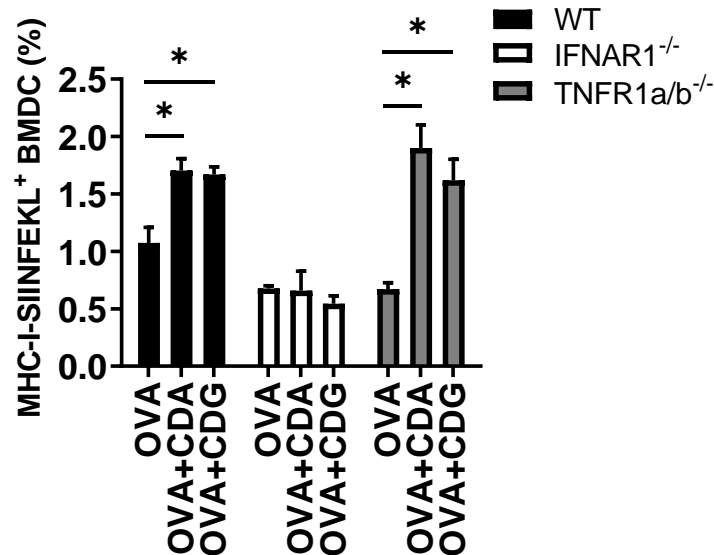

**Supplementary Figure S1: Cross-presentation of the OVA immunodominant peptide SIINFEKL in BMDC pulsed with OVA +/- CDN.** Cross-presentation of BMDC from IFNAR1<sup>-/-</sup> and TNFR1a/b<sup>-/-</sup> mice was compared to WT counterparts in the presence or absence of CDA or CDG. Error bars indicate SEM. Statistical significance was calculated using one-tailed Student's t-test. \* indicates  $p < 0.05$ .

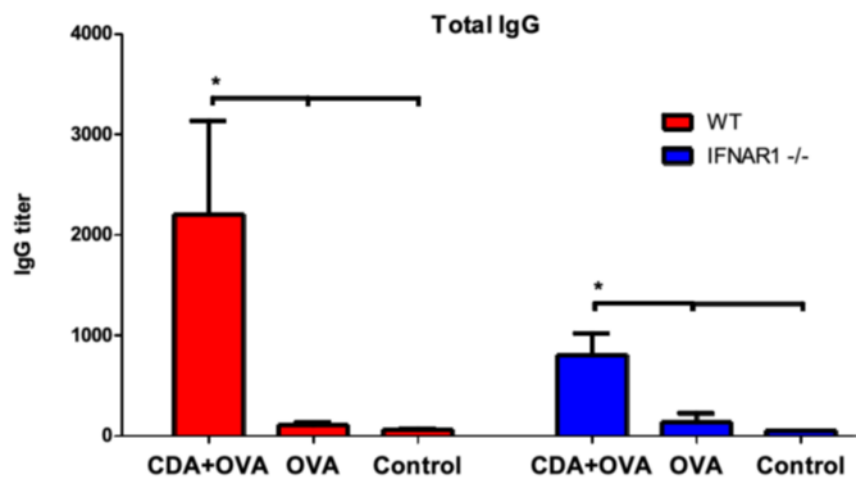

**Supplementary Figure S2: Antigen specific IgG titer after vaccination.** OVA specific IgG titers from vaccinated WT and IFNAR1<sup>-/-</sup> mice were determined by ELISA. Error bars indicate SEM. Statistical significance was calculated using one-tailed Student's t-test. \* indicates  $p < 0.05$ . The results are representative of four independent experiments (WT,  $n=3-4$ ; IFNAR1<sup>-/-</sup>,  $n=3-4$ ).
